# Supplementary material
Source: Springer Nature journal article supplement (https://www.springermedizin.de/resource/supplementary/13256_2010_1497_MOESM8_ESM.pdf/9647772)

Se:606  
Im:1

[A]

[R]

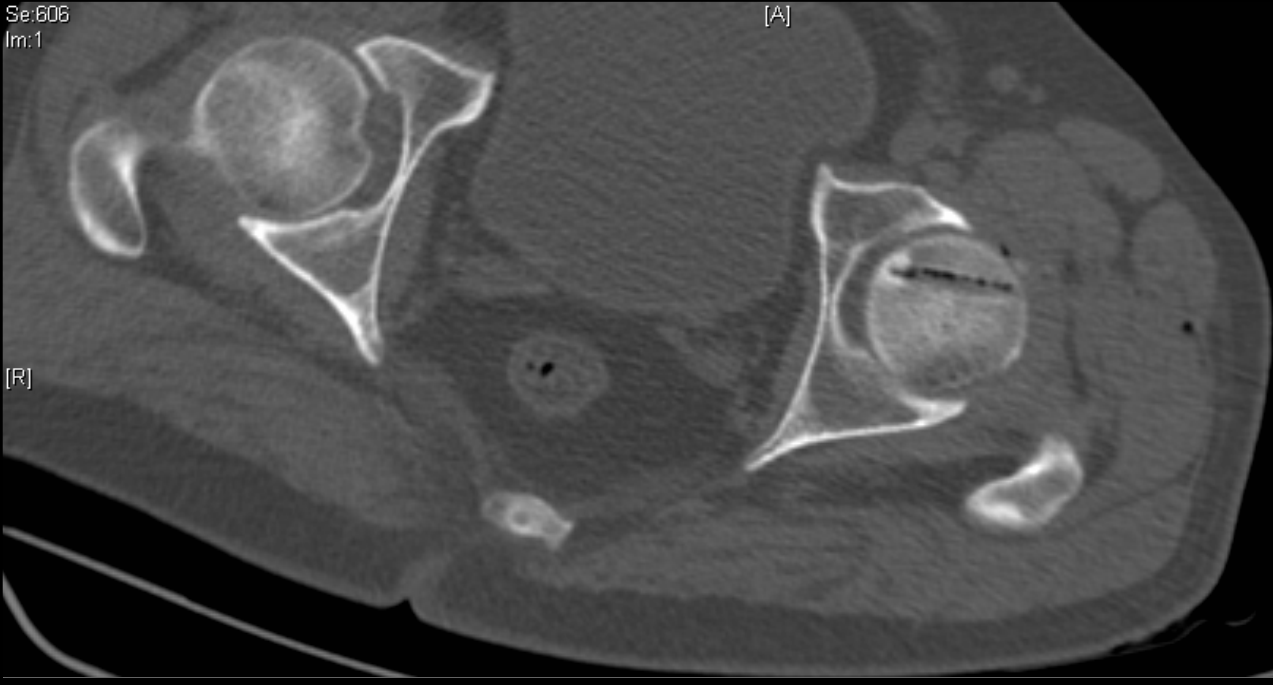

Supplement: MOESM8 [file 9647772]
